# Supplementary material for: Association of triglyceride-glucose index with postoperative recovery-related factors in type II cesarean scar pregnancy treated by transvaginal surgery
Source: PeerJ. 2025 Jun 20;13:e19632. doi: 10.7717/peerj.19632 (PMC12184668; doi:10.7717/peerj.19632)
Supplement: Supplemental Information 1 [file peerj-13-19632-s001.xlsx]

## Sheet: Sheet1
Serial number	age	nation	Marital status	Drinking status	smoking	hypertension	TyG	Total cholesterol (mmol/L)	Triglyceride (mmol/L)	Fasting blood glucose (mmol/L)	High density lipoprotein (mmol/L)	Days of menopause	gravida	Time since last cesarean section (years)	Mean diameter of lower uterine incision mass (mm)	Preoperative HCG value (mIU/ml)	Operation time (minutes)	Intraoperative blood loss (ml)	Length of stay (days)	Hospitalization expenses (Yuan)	Postoperative vaginal bleeding time (days)	Menstrual recovery time (days)
1	27	The Han nationality	Be married	no	no	no	8.03	4.62	0.82	4.68	1.33	43	4	2	13	108822	39	20	8	7274.9	10	36
2	34	The Han nationality	Be married	no	no	no	7.11	3.37	0.37	4.16	1.29	46	6	4	20	95807	35	20	9	8998.39	9	38
3	30	The Han nationality	Be married	no	no	no	8.06	4.23	0.93	4.29	1.46	61	3	1	20	8776.2	44	10	6	6527.62	10	37
4	34	The Han nationality	Be married	no	no	no	8.19	3.36	1.08	4.2	1.25	44	5	10	20	67514	50	10	8	7509.27	12	35
5	32	The Han nationality	Be married	no	no	no	7.6	4.38	0.54	4.62	1.6	39	2	6	8	20495	30	10	11	7986.7	11	33
6	28	The Han nationality	Be married	no	no	no	7.29	3.91	0.41	4.47	1.44	45	2	4	6	7395.9	25	20	7	7901.5	12	42
7	29	The Han nationality	Be married	no	no	no	7.98	3.63	0.76	4.82	1.51	39	4	9	12	41064	25	20	8	8256.5	8	39
8	29	The Han nationality	Be married	no	no	no	8.37	3.9	0.98	5.51	1.24	44	4	3	17	105095	24	50	7	8118.64	9	40
9	33	The Han nationality	Be married	no	no	no	7.98	3.15	0.84	4.37	1.02	51	8	7	14	4856	27	20	7	7568.53	10	39
10	32	The Han nationality	Be married	no	no	no	7.97	3.58	0.94	3.85	1.23	45	4	4	32	186889	30	20	7	8081.96	12	36
11	35	The Han nationality	Be married	no	no	no	8.35	4.34	1.09	4.86	1.22	47	7	5	25	123097	38	20	8	8288.26	11	33
12	30	The Han nationality	Be married	no	no	no	9.36	5.31	2.75	5.31	1.2	62	3	4	16	39840	24	20	6	7269.66	10	35
13	33	The Han nationality	Be married	no	no	no	8.16	4.64	0.82	5.33	1.23	61	3	2	18	32879.9	33	20	8	8951.73	8	32
14	39	The Han nationality	Be married	no	no	no	9.03	4.02	1.4	7.48	1.1	42	4	5	9	11992	33	20	12	8728.4	8	37
15	29	The Han nationality	Be married	no	no	no	7.96	4.44	0.8	4.51	1.53	40	4	1	29	14827	38	20	6	6839.5	7	36
16	40	The Han nationality	Be married	no	no	no	9.33	4.6	2.83	5.01	1.41	49	6	8	13	18910	33	20	7	8263.9	9	40
17	31	The Han nationality	Be married	no	no	no	7.84	3.43	0.61	5.2	0.98	38	4	4	13	22990	30	10	7	8969.6	12	37
18	34	The Han nationality	Be married	no	no	no	8.09	4.79	0.93	4.39	1.72	42	5	6	17	42303.9	41	10	8	8632.08	10	39
19	30	The Han nationality	Be married	no	no	no	7.41	3.16	0.49	4.21	1.18	50	3	3	15	45392.1	26	20	6	7656.71	10	32
20	31	The Han nationality	Be married	no	no	no	7.11	3.37	0.41	3.76	1.24	58	6	3	27	185399	43	50	9	9821.87	9	33
21	30	The Han nationality	Be married	no	no	no	8.14	4.08	0.97	4.44	1.06	50	3	6	25	93618	46	20	6	9684.42	9	31
22	34	The Han nationality	Be married	no	no	no	7.95	7.33	0.77	4.64	1.47	66	5	8	34	4078	30	10	7	8781.92	10	33
23	34	The Han nationality	Be married	no	no	no	7.71	3.66	0.62	4.52	0.98	50	3	10	11	8467	30	10	5	8087.08	11	36
24	29	The Han nationality	Be married	no	no	no	8.28	3.94	1	4.94	1.1	44	3	3	13	18345	25	10	7	8413.37	8	36
25	40	The Han nationality	Be married	no	no	no	8.29	4.6	1.04	4.79	1.33	48	13	9	22	126500	18	5	8	8788.2	9	38
26	36	The Han nationality	Be married	no	no	no	8.12	4.03	0.79	5.34	unidentified	46	3	9	20	57736	32	20	5	8606	12	32
27	29	The Han nationality	Be married	no	no	no	7.89	3.62	0.72	4.67	unidentified	68	2	6	27	36487	38	20	7	9600.33	11	29
28	41	The Han nationality	Be married	no	no	no	8.69	4.65	1.33	5.58	unidentified	54	3	4	8	8263	36	10	5	7475.32	12	32
29	34	The Han nationality	Be married	no	no	no	8.25	3.39	0.94	5.13	unidentified	49	5	5	11	19818	28	5	7	8176.43	10	31
30	31	The Han nationality	Be married	no	no	no	7.91	4.05	0.73	4.68	1.09	45	4	8	22	45792	32	10	7	8932.23	8	30
31	31	The Han nationality	Be married	no	no	no	7.51	2.66	0.45	5.07	0.99	39	6	2	8	11351	18	20	8	8788.16	9	35
32	32	The Han nationality	Be married	no	no	no	7.59	2.72	0.53	4.67	0.86	41	5	5	25	28181	26	5	6	8893.92	9	31
33	34	The Han nationality	Be married	no	no	no	8.4	4.58	1.06	5.25	1.75	57	5	11	26	16047	45	20	7	9953	9	37
34	31	The Han nationality	Be married	no	no	no	8.51	2.97	1.17	5.34	1	44	3	9	15	86780	26	20	5	8188	10	35
35	36	The Han nationality	Be married	no	no	no	8.2	6.58	0.89	5.11	1.52	44	6	1	7	12037	45	20	4	8538.9	10	37
36	35	The Han nationality	Be married	no	no	no	7.9	3.46	0.71	4.77	1.23	42	4	7	9	14773	31	20	5	8665.71	9	41
37	32	The Han nationality	Be married	no	no	no	7.95	3.77	0.64	5.55	1.24	39	5	8	13	38492	17	5	8	10939.8	9	40
38	36	The Han nationality	Be married	no	no	no	8.22	4.22	0.99	4.69	1.15	56	4	5	20	63438	20	10	5	8650.09	10	39
39	29	The Han nationality	Be married	no	no	no	8.23	3.72	0.94	5.03	1.31	35	4	3	13	16854	55	20	5	9427.33	9	38
40	33	The Han nationality	Be married	no	no	no	8.64	3.66	1.33	5.31	1.01	43	4	7	12	18979	23	5	4	7783.06	10	36
41	29	The Han nationality	Be married	no	no	no	8.97	5.85	1.84	5.35	1.54	53	7	4	14	17291	30	5	4	7831.4	9	35
42	34	The Han nationality	Be married	no	no	no	8.07	3	0.77	5.22	0.96	53	6	5	12	82006	42	5	6	8009.77	10	40
43	36	The Han nationality	Be married	no	no	no	9.51	3.43	3.12	5.42	0.99	43	3	8	15	15797.3	25	5	4	7373.01	9	41
44	35	The Han nationality	Be married	no	no	no	8.46	3.38	1.11	5.32	1.36	43	2	3	10	63677	30	5	4	7343.9	11	34
45	38	The Han nationality	Be married	no	no	no	7.72	3.78	0.6	4.72	1.31	41	3	5	13	65802	23	10	8	10296	12	37
